# Supplementary material for: A robust core–shell nanostructured nickel–iron alloy@nitrogen-containing carbon catalyst for the highly efficient hydrogenation of nitroarenes
Source: Royal Society of Chemistry journal article supplement (doi:10.1039/c8dt03033b), 2018-01-01
Supplement: c8dt03033b1.pdf [file c8dt03033b1.pdf]

## Supporting Information

### A robust core-shell nanostructured nickel-iron alloy@nitrogen-containing carbon catalyst for highly efficient hydrogenation of nitroarenes

Yaowen Zhang, Chunling Liu, Guoli Fan, Lan Yang and Feng Li\*

State Key Laboratory of Chemical Resource Engineering, Beijing Advanced Innovation Center for Soft Matter Science and Engineering, Beijing University of Chemical Technology, Beijing, 100029, P.R. China

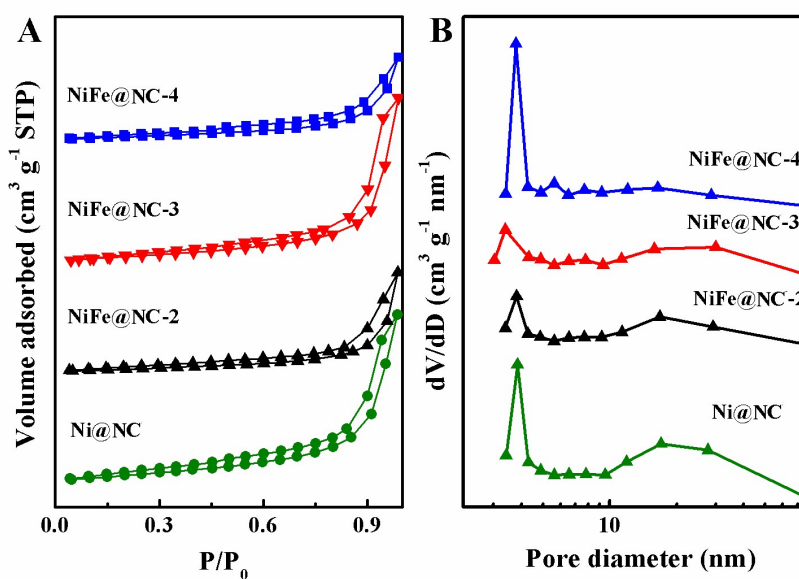

Fig.S1 Low-temperature N<sub>2</sub> adsorption-desorption isotherms (A) and corresponding pore size distributions (B) of different samples.

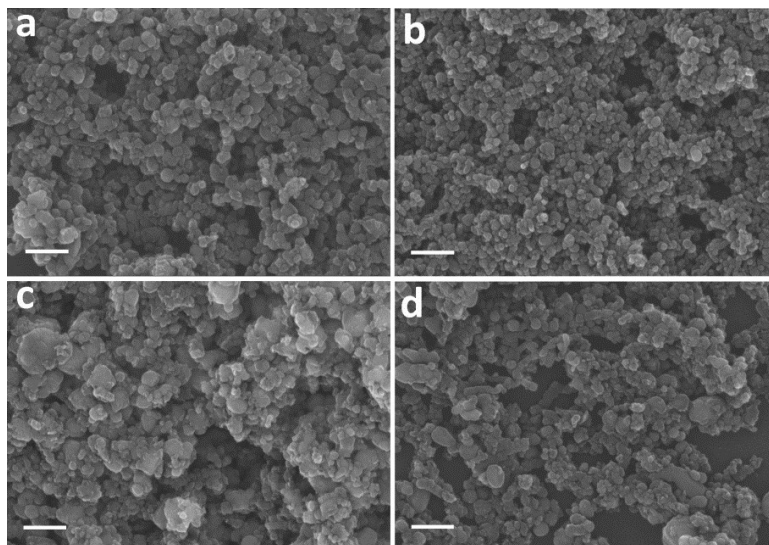

**Fig.S2** SEM images of NiFe@NC-2 (a), NiFe@NC-3(b), NiFe@NC-4 (c) and Ni@NC (d) samples. The bar scale is 200 nm.

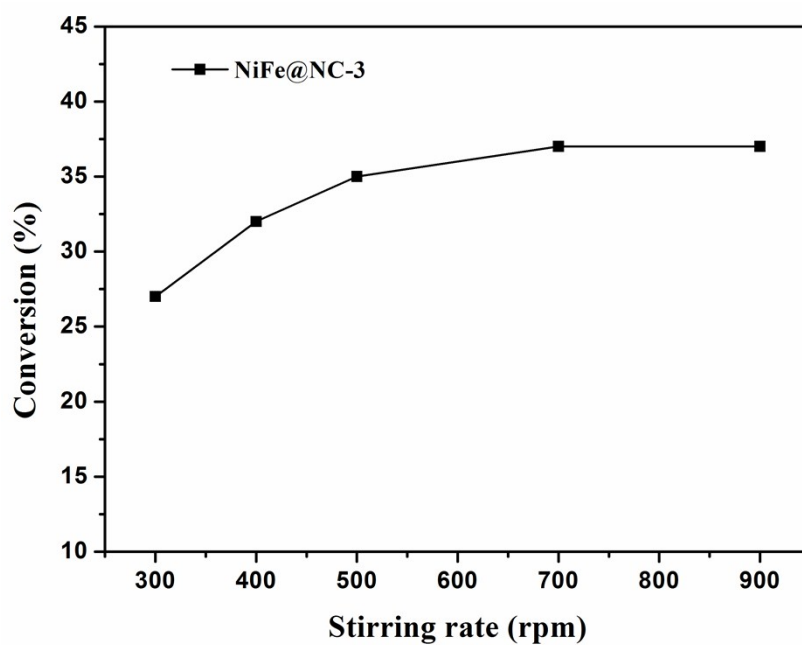

**Fig.S3** Dependence of *o*-CNB conversion on the stirring rate over NiFe@NC-3. Reaction conditions: 80 °C, 0.5 MPa hydrogen pressure and 60 min.

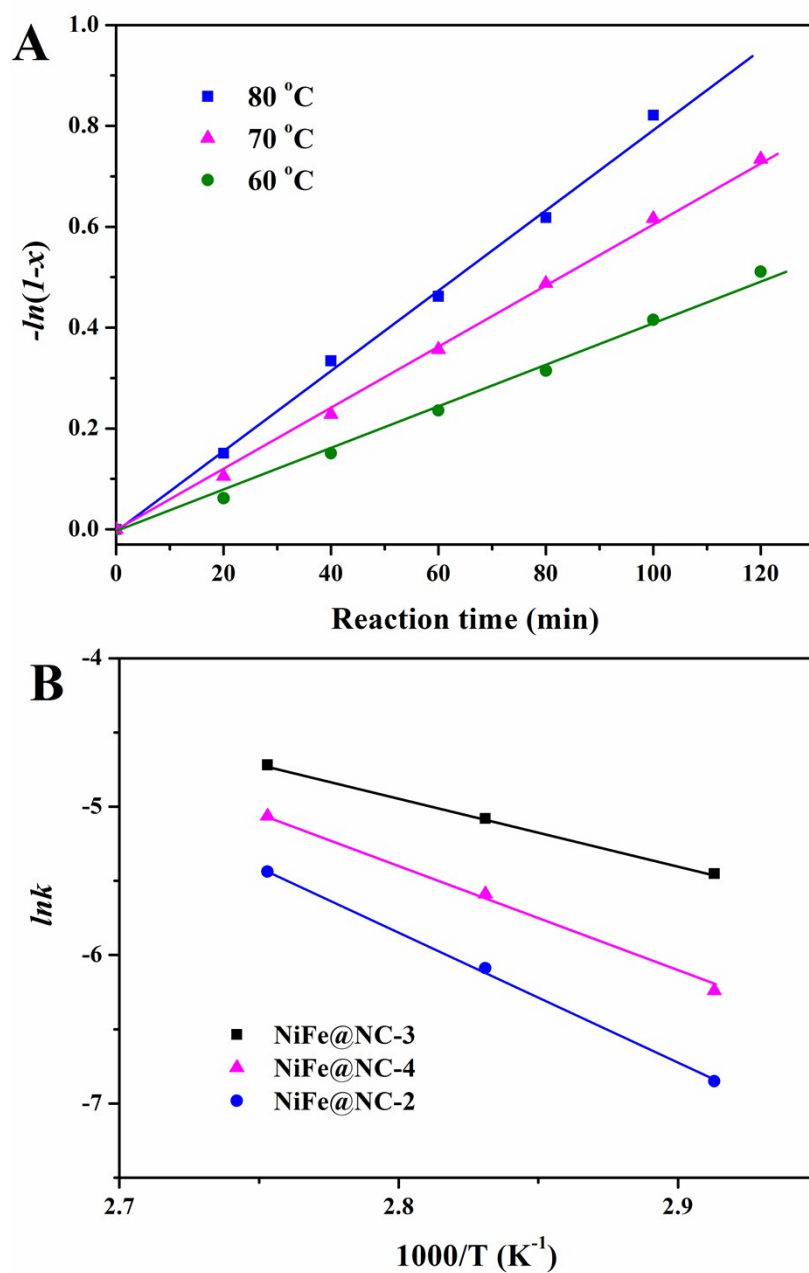

**Fig.S4** A)  $-\ln(1-x)$  vs. reaction time over the NiFe@NC-3 at different temperatures and B)  $\ln$  (reaction rate constant) vs. reciprocal of reaction temperature over different NiFe@NC catalysts in the *o*-CNB hydrogenation.

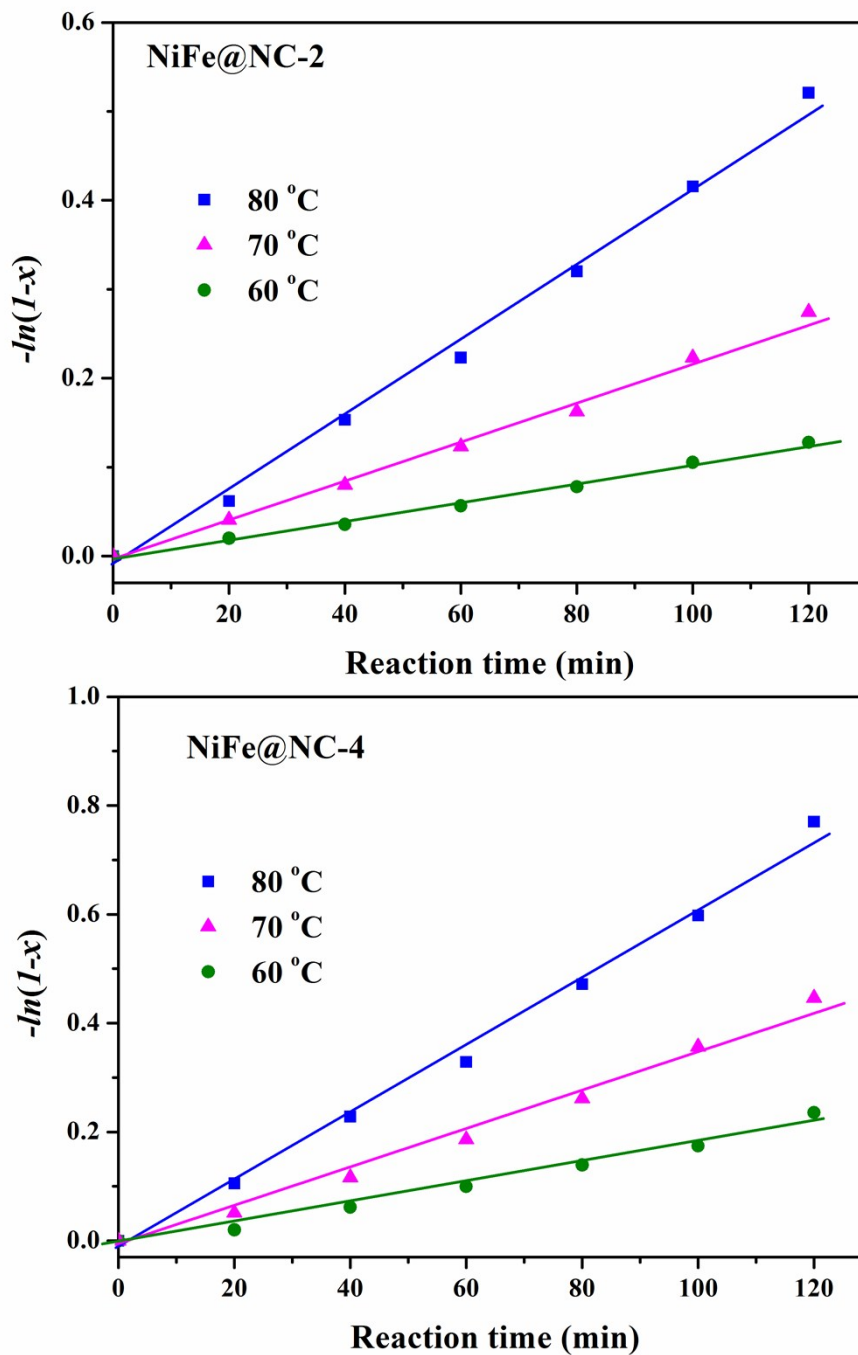

**Fig.S5**  $-\ln(1-x)$  vs. reaction time over NiFe@NC-2 and NiFe@NC-4 catalysts at different temperatures

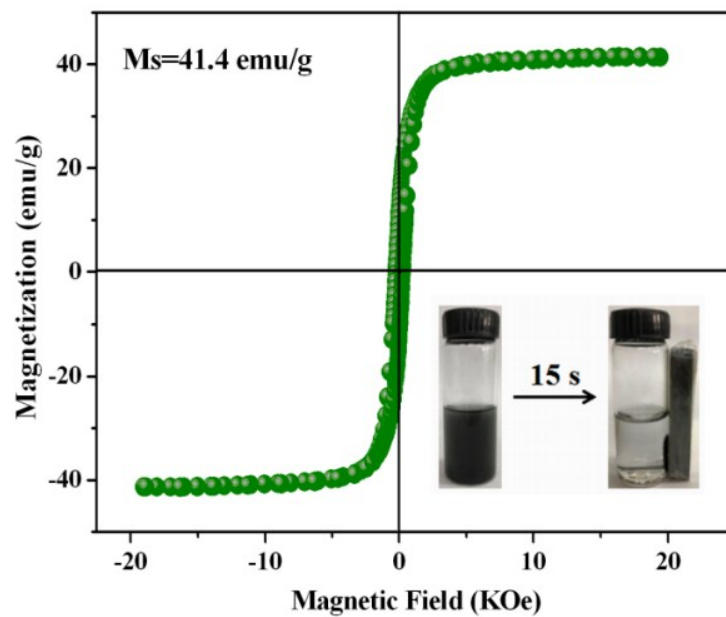

**Fig.S6** Room-temperature magnetization plot of representative NiFe@NC-3 catalyst.

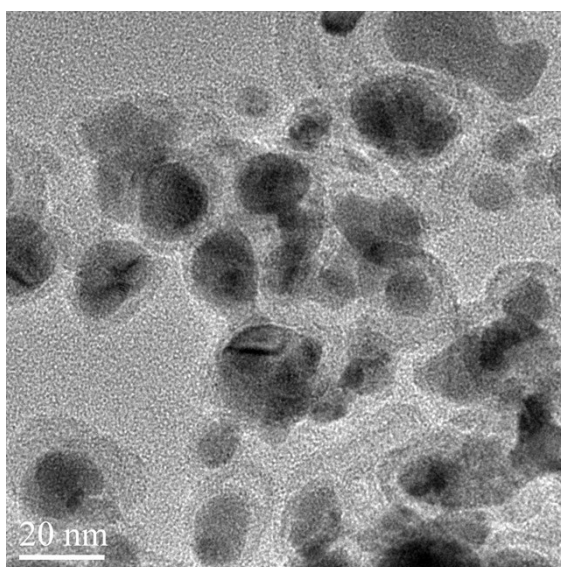

**Fig.S7** TEM image of NiFe@NC-3 after recycling for seventeen times.

**Table S1** Catalytic performances of other Ni-based catalysts in the hydrogenation of CNB.

| Catalyst              | Substrate     | Time (min) | Temp. (°C) | P <sub>H2</sub> (MPa) | Conv. (%) | Selec.to <i>o</i> -CAN (%) | Rate of CNB converted ( $\mu\text{mol}\cdot\text{g}_{\text{cat}}^{-1}\cdot\text{s}^{-1}$ ) | Ref.      |
|-----------------------|---------------|------------|------------|-----------------------|-----------|----------------------------|--------------------------------------------------------------------------------------------|-----------|
| Ni/TiO <sub>2</sub>   | <i>o</i> -CNB | 120        | 80         | 1.0                   | 97        | >98.0                      | 8.6 <sup>a</sup>                                                                           | [53]      |
| Ni/C                  | <i>o</i> -CNB | 120        | 140        | 2.0                   | 98.9      | 86.0                       | 8.7 <sup>a</sup>                                                                           | [54]      |
| Ni-B                  | <i>p</i> -CNB | 90         | 80         | 1.0                   | 98.3      | 94.5 <sup>b</sup>          | 12.1 <sup>c</sup>                                                                          | [55]      |
| Raney Ni              | <i>p</i> -CNB | --         | 120        | 1.5                   | --        | 99 <sup>b</sup>            | 8.1                                                                                        | [56]      |
| Ni/filamentous carbon | <i>p</i> -CNB | --         | 120        | 1.5                   | --        | 97 <sup>b</sup>            | 4.5                                                                                        | [56]      |
| NiFe@NC-3             | <i>o</i> -CNB | 210        | 80         | 0.5                   | 100       | 99.5                       | 18.9                                                                                       | This work |

<sup>a</sup> data obtained during 120 min; <sup>b</sup> *p*-CAN product; <sup>c</sup> data obtained during 90 min based on the Ni mass ( $\mu\text{mol}\cdot\text{g}_{\text{Ni}}^{-1}\cdot\text{s}^{-1}$ ).
